# Supplementary material for: Tracking Pseudomonas aeruginosa transmissions due to environmental contamination after discharge in ICUs using mathematical models
Source: PubMed Central journal article supplement (PMC6736315; doi:10.1371/journal.pcbi.1006697), 2019-08-28
Supplement: pcbi.1006697.s001.pdf [file pcbi.1006697.s001.pdf]

## Supporting information

**S1 Text. Environmental contamination.** The full model includes environmental contamination on a ward-level. The bacterial load at any given time  $t$  is based on the differential equation

$$\frac{dE}{dt} = \nu \frac{I(t)}{N(t)} - \mu E(t) \quad (1)$$

Solving the above differential equation requires discretizing over  $t$ , resulting in a finite number of time steps  $t_0, t_1, \dots, t_N$ . We then assume  $I(t) = I_t$  and  $N(t) = N_t$  to be constant within a time step and use it as initial conditions. Separating variables leads to

$$\frac{dE}{\nu \cdot \frac{I_t}{N_t} - \mu E(t)} = dt$$

and thus

$$\begin{aligned} \int \frac{dE}{\nu \frac{I_t}{N_t} - \mu E(t)} &= \int dt \\ \Rightarrow -\frac{1}{\mu} \log \left| \nu \frac{I_t}{N_t} - \mu E(t) \right| &= t + C \\ \Rightarrow \log \left| \nu \frac{I_t}{N_t} - \mu E(t) \right| &= -\mu(t + C) \\ \Rightarrow \left| \nu \frac{I_t}{N_t} - \mu E(t) \right| &= \exp[-\mu(t + C)] = \exp(-\mu t) \underbrace{\exp(-\mu C)}_{A_t} \end{aligned}$$

Now, two cases have to be distinguished.

1. Case:  $\nu \frac{I_t}{N_t} - \mu E(t) \geq 0$

$$\begin{aligned} \Rightarrow -\mu E(t) &= A_t \cdot \exp[-\mu t] - \nu \frac{I_t}{N_t} \\ \Rightarrow E(t) &= -\underbrace{\frac{A_t}{\mu}}_{B_t} \exp[-\mu t] + \frac{\nu}{\mu} \frac{I_t}{N_t} \\ \Rightarrow E(t) &= B_t \cdot \exp[-\mu t] + \frac{\nu}{\mu} \frac{I_t}{N_t}. \end{aligned}$$

2. Case:  $\nu \frac{I_t}{N_t} - \mu E(t) < 0$

$$\Rightarrow \mu E(t) = A_t \cdot \exp[-\mu t] + \nu \frac{I_t}{N_t}$$

$$\begin{aligned}\Rightarrow E(t) &= \underbrace{\frac{A_t}{\mu}}_{B_t} \exp[-\mu t] + \frac{\nu}{\mu} \frac{I_t}{N_t} \\ \Rightarrow E(t) &= B_t \cdot \exp[-\mu t] + \frac{\nu}{\mu} \frac{I_t}{N_t}.\end{aligned}$$

Determine  $B_{t_0}$  for initial condition  $E(t_0) = E_{t_0}$ :

$$E_{t_0} = E(t_0) = B_0 + \frac{\nu}{\mu} \frac{I_{t_0}}{N_{t_0}}$$

and therefore

$$B_{t_0} = E_{t_0} - \frac{\nu}{\mu} \frac{I_{t_0}}{N_{t_0}}. \quad (2)$$

For  $t_0 \leq t \leq t_1$  the environmental load can be then computed by

$$\begin{aligned}E(t) &= \left( E_{t_0} - \frac{\nu}{\mu} \frac{I_{t_0}}{N_{t_0}} \right) e^{-\mu t} + \frac{\nu}{\mu} \frac{I_t}{N_{t_0}} \\ &= E_{t_0} e^{-\mu t} + \frac{\nu}{\mu} \frac{I_{t_0}}{N_{t_0}} (1 - e^{-\mu t}).\end{aligned}$$

For  $t_0 \leq t_i \leq t_N$  it holds

$$B_{t_i} = \frac{E_{t_i} - \frac{\nu}{\mu} \frac{I_{t_i}}{N_{t_i}}}{e^{-\mu t_i}} \quad (3)$$

and therefore, it holds for  $\lfloor t \rfloor := \max\{t_0 \leq x \leq t_N \mid x \leq t\}$  and  $t \in \mathbb{R} \setminus \{t_0, t_1, \dots, t_N\}$

$$\begin{aligned}E(t) &= \frac{E_{\lfloor t \rfloor} - \frac{\nu}{\mu} \frac{I_{\lfloor t \rfloor}}{N_{\lfloor t \rfloor}}}{e^{-\mu \lfloor t \rfloor}} \cdot e^{-\mu t} + \frac{\nu}{\mu} \frac{I_{\lfloor t \rfloor}}{N_{\lfloor t \rfloor}} \\ &= E_{\lfloor t \rfloor} e^{-\mu(t-\lfloor t \rfloor)} + \frac{\nu}{\mu} \frac{I_{\lfloor t \rfloor}}{N_{\lfloor t \rfloor}} \left( 1 - e^{-\mu(t-\lfloor t \rfloor)} \right).\end{aligned}$$

and

$$E(t_i) = E_{t_{i-1}} e^{-\mu(t_i-t_{i-1})} + \frac{\nu}{\mu} \frac{I_{t_{i-1}}}{N_{t_{i-1}}} \left( 1 - e^{-\mu(t_i-t_{i-1})} \right)$$

for  $0 \leq i \leq N$ .
