# Supplementary material for: Tracking Pseudomonas aeruginosa transmissions due to environmental contamination after discharge in ICUs using mathematical models
Source: PubMed Central journal article supplement (PMC6736315; doi:10.1371/journal.pcbi.1006697), 2019-08-28
Supplement: pcbi.1006697.s002.pdf [file pcbi.1006697.s002.pdf]

**S2 Text. Discrete-time transmission model.** For the discrete-time transmission model, we assume that the number of colonized patients  $I(t)$ , the total number of patients  $N(t)$  and the bacterial load  $E(t)$  is constant during the day. It is assumed that admission and screening occur at 12:00 pm on each day  $T$  determining  $I_T$  and  $N_T$ . Given all the information (at 12:00 pm), the environmental contamination on day  $T$  is determined. The force of infection on day  $T$  is then given by

$$\begin{aligned}\lambda(T) &= \alpha + \beta \frac{I_T}{N_T} + \epsilon E(T) \\ &= \alpha + \beta \frac{I_T}{N_T} + \epsilon \cdot \left[ E_{T-1} e^{-\mu} + \frac{\nu}{\mu} \frac{I_{T-1}}{N_{T-1}} (1 - e^{-\mu}) \right].\end{aligned}$$
