# Supplementary material for: Tracking Pseudomonas aeruginosa transmissions due to environmental contamination after discharge in ICUs using mathematical models
Source: PubMed Central journal article supplement (PMC6736315; doi:10.1371/journal.pcbi.1006697), 2019-08-28
Supplement: pcbi.1006697.s004.pdf [file pcbi.1006697.s004.pdf]

**S4 Text. Approximation of relative contribution in discrete-time.** Large values of the force of infection  $\lambda(t)$  are very unlikely. Under the assumption of small  $\lambda(t)$ , the following simplifications and approximations can be made:

$$e^{-\int_0^t \lambda(x) dx} \approx 1 - \lambda(t)$$

$$1 - e^{-\int_0^t \lambda(x) dx} \approx \lambda(t)$$

$$\frac{\lambda(t)}{1 - \lambda(t)} \approx \lambda(t).$$

Therefore, the force of infection itself may be a good approximation of the probability of infection and the probability of acquiring colonization due to route  $j$  may be approximated by the respective sub-term of the force of infection assigned to route  $j$ :

$$P(\text{infection during day } T \text{ due to route } j) \approx \lambda_j$$

with  $j \in \{\text{background, crossT, env}\}$ . As an approximation of the relative contribution we compute the ratio of the transmission rate and the force of infection for each acquired colonization:

- Contribution of endogenous route =  $R_{\text{background}} = \frac{\sum_{i=1}^n \frac{\alpha}{\lambda(t_i^c)}}{N_{\text{acq}}}$
- Contribution of cross-transmission =  $R_{\text{crossT}} = \frac{\sum_{i=1}^n \frac{\beta \cdot \frac{I(t_i^c)}{N(t_i^c)} + \epsilon \sum_{i_p} \frac{E_{i_p}(t_i^c)}{N(t_i^c)}}{\lambda(t_i^c)}}{N_{\text{acq}}}$
- Contribution of environmental contamination =  $R_{\text{env}} = \frac{\sum_{i=1}^n \frac{\epsilon \left[ \sum_{i_d} \frac{E_{i_d}(t_i^c)}{N(t_i^c)} + E_0 e^{-\mu t_i^c} \right]}{\lambda(t_i^c)}}{N_{\text{acq}}}$

where  $t_i^c$  is the day of colonization of patient  $i \in \{1, \dots, n\}$  and  $N_{\text{acq}}$  the total number of occurred colonizations. Furthermore,  $i_p$  indicates a colonized patient that is present at time  $t_i^c$  and  $i_d$  a colonized patient that has been colonized prior to  $t_i^c$  but was already discharged. It holds  $R_{\text{background}} + R_{\text{crossT}} + R_{\text{env}} = 1$ .
