# Supplementary material for: Tracking Pseudomonas aeruginosa transmissions due to environmental contamination after discharge in ICUs using mathematical models
Source: PubMed Central journal article supplement (PMC6736315; doi:10.1371/journal.pcbi.1006697), 2019-08-28
Supplement: pcbi.1006697.s013.pdf [file pcbi.1006697.s013.pdf]

**S1 Table. Summary statistics of the marginal posterior distributions for parameters of the submodel based on the analysis of the Besançon data.**

| Parameter                       | Symbol                      | Median (95% credibility interval)* |                      |                      |
|---------------------------------|-----------------------------|------------------------------------|----------------------|----------------------|
|                                 |                             | ICU A                              | ICU B                | ICUs combined        |
| Background coefficient          | $\alpha$                    | 0.011 (0.008, 0.015)               | 0.008 (0.006, 0.011) | 0.009 (0.007, 0.011) |
| Cross-transmission coefficient  | $\beta$                     | 0.03 (0.012, 0.046)                | 0.038 (0.006, 0.011) | 0.034 (0.024, 0.044) |
| Sensitivity                     | $\phi$ (%)                  | 50.7 (48.0, 53.2)                  | 60.5 (58.8, 62.1)    | 57.5 (56.2, 58.9)    |
| Importation probability         | $f$ (%)                     | 5.5 (4.5, 6.5)                     | 7.6 (6.7, 8.6)       | 6.5 (5.8, 7.2)       |
| Fraction colonized              | $p_{\text{col}}$ (%)        | 22.2 (21.2, 23.1)                  | 23.2 (22.7, 23.7)    | 22.4 (21.9, 22.8)    |
| <b>Contributions</b>            |                             |                                    |                      |                      |
| Background contribution         | $R_{\text{background}}$ (%) | 65.1 (46.4, 84.6)                  | 51.1 (35.5, 66.9)    | 57.6 (46.0, 68.9)    |
| Cross-transmission contribution | $R_{\text{crossT}}$ (%)     | 34.9 (15.4, 53.6)                  | 48.9 (33.1, 64.5)    | 42.4 (31.1, 54.0)    |

\*Highest posterior density interval
