# Supplementary material for: Tracking Pseudomonas aeruginosa transmissions due to environmental contamination after discharge in ICUs using mathematical models
Source: PubMed Central journal article supplement (PMC6736315; doi:10.1371/journal.pcbi.1006697), 2019-08-28
Supplement: pcbi.1006697.s014.pdf [file pcbi.1006697.s014.pdf]

**S2 Table. Summary statistics of the marginal posterior distributions for parameters of the full model based on the analysis the Besançon data.**

| Parameter                      | Symbol                      | Median (95% credibility interval)* |                  |        |                |               |                |
|--------------------------------|-----------------------------|------------------------------------|------------------|--------|----------------|---------------|----------------|
|                                |                             | ICU A                              |                  | ICU B  |                | ICUs combined |                |
| Background coefficient         | $\alpha$                    | 0.011                              | (0.008, 0.014)   | 0.008  | (0.006, 0.011) | 0.009         | (0.007, 0.011) |
| Cross-transmission coefficient | $\beta$                     | 0.013                              | (0, 0.033)       | 0.022  | (0, 0.011)     | 0.018         | (0, 0.034)     |
| Environmental coefficient      | $\epsilon$                  | 201.1                              | (0.018, 832.829) | 176.7  | (0.009, 811.6) | 209.0         | (0.02, 784.5)  |
| Decay rate                     | $\mu$                       | 1415.8                             | (65.6, 4273.8)   | 1396.9 | (26.4, 3992.2) | 1419.2        | (43.7, 4524.0) |
| Sensitivity                    | $\phi$ (%)                  | 50.6                               | (48.0, 53.1)     | 60.5   | (58.9, 62.1)   | 57.6          | (56.2, 58.9)   |
| Importation probability        | $f$ (%)                     | 5.5                                | (4.5, 6.6)       | 7.5    | (6.6, 8.4)     | 6.4           | (5.7, 7.2)     |
| Fraction colonized             | $p_{\text{col}}$ (%)        | 22.2                               | (21.3, 23.1)     | 23.2   | (22.7, 23.6)   | 22.4          | (21.9, 22.8)   |
| <b>Contributions</b>           |                             |                                    |                  |        |                |               |                |
| Background                     | $R_{\text{background}}$ (%) | 62.2                               | (44.8, 79.7)     | 50.4   | (35.6, 65.2)   | 57.6          | (45.5, 67.9)   |
| Cross-transmission             | $R_{\text{crossT}}$ (%)     | 37.2                               | (20.4, 54.9)     | 49.0   | (34.0, 63.1)   | 42.7          | (31.9, 54.0)   |
| Env. cont. after discharge     | $R_{\text{env}}$ (%)        | 0.006                              | (0, 0.013)       | 0.005  | (0, 0.013)     | 0.006         | (0, 0.012)     |

\*Highest posterior density interval
