# Supplementary material for: Tracking Pseudomonas aeruginosa transmissions due to environmental contamination after discharge in ICUs using mathematical models
Source: PubMed Central journal article supplement (PMC6736315; doi:10.1371/journal.pcbi.1006697), 2019-08-28
Supplement: pcbi.1006697.s016.pdf [file pcbi.1006697.s016.pdf]

**S4 Table. Association of colonization statuses of consecutive bed occupants in ICU B of the University Hospital of Besançon.**

|                    |               | Current bed occupant |               |
|--------------------|---------------|----------------------|---------------|
|                    |               | Colonized            | Non-colonized |
| Prior bed occupant | Colonized     | 123                  | 586           |
|                    | Non-colonized | 610                  | 4479          |
