# Supplementary material for: Tracking Pseudomonas aeruginosa transmissions due to environmental contamination after discharge in ICUs using mathematical models
Source: PubMed Central journal article supplement (PMC6736315; doi:10.1371/journal.pcbi.1006697), 2019-08-28
Supplement: pcbi.1006697.s017.pdf [file pcbi.1006697.s017.pdf]

**S5 Table. Summary statistics of the marginal posterior distributions for parameters of model (7) based on the analysis of the Besançon data.**

| Parameter                      | Symbol                      | Median (95% credibility interval)* |                |       |                |
|--------------------------------|-----------------------------|------------------------------------|----------------|-------|----------------|
|                                |                             | ICU A                              |                | ICU B |                |
| Background coefficient         | $\alpha$                    | 0.011                              | (0.008, 0.014) | 0.008 | (0.006, 0.011) |
| Cross-transmission coefficient | $\beta$                     | 0.027                              | (0.013, 0.041) | 0.036 | (0.023, 0.048) |
| Prior bed occupant coefficient | $p$                         | 0.004                              | (0, 0.007)     | 0.003 | (0, 0.006)     |
| Sensitivity                    | $\phi$ (%)                  | 50.6                               | (48.0, 53.1)   | 60.5  | (58.9, 62.1)   |
| Importation probability        | $f$ (%)                     | 5.5                                | (4.5, 6.6)     | 7.5   | (6.6, 8.4)     |
| Fraction colonized             | $p_{\text{col}}$ (%)        | 22.2                               | (21.3, 23.1)   | 23.2  | (22.7, 23.6)   |
| <b>Contributions</b>           |                             |                                    |                |       |                |
| Background                     | $R_{\text{background}}$ (%) | 65.1                               | (48.8, 81.7)   | 50.4  | (35.7, 66.6)   |
| Cross-transmission             | $R_{\text{crossT}}$ (%)     | 31.8                               | (14.6, 47.2)   | 46.8  | (31.3, 62.1)   |
| Prior bed occupants discharge  | $R_{\text{prior}}$ (%)      | 3.1                                | (0, 6)         | 2.6   | (0, 5.6)       |

\*Highest posterior density interval
